# Supplementary material
Source: PubMed Central journal article supplement (PMC2706452)
Supplement: rsif20080045s01.pdf [file rsif20080045s01.pdf]

# Electronic Supplementary Material

## Discrete Stochastic Mammalian Model

This model is the discrete stochastic version of the model in [1], which, in turn, is constructed from Leloup and Goldbeter's [2] 16-state mammalian model. In Tables 1 and 2, we list the reactions involved in a single cell. To convert molar concentrations in the deterministic model to populations (number of each chemical species) requires converting the concentration to units of molecules per liter then multiplying by a cell volume  $V$ . The scaling constant  $\Omega$  is given by

$$\Omega = N_A \text{ [molecules/liter]} \times V \text{ [liters]} \quad (1)$$

where Avogadro's number  $N_A = 6.022 \times 10^{23}$ . For  $\Omega = 600$  used in this model

$$1 \text{ nM} \times \Omega = 1 \text{ nM} \times \frac{1 \text{ M}}{10^9 \text{ nM}} \times 6.022 \times 10^{23} \frac{\text{molecules}}{\text{liter}} \times V \text{ liters.} \quad (2)$$

Solving for  $V$  gives a volume of  $V = 1.7e^{-15}$  liters.

Due to the small grid size currently feasible in a reasonable simulation run time, the coupling topology was changed from the  $1/r$  distance weighting used in [1], to a mean-field coupling. This eliminates grid boundary effects that may skew results if the  $1/r$  coupling were used in such a small grid. The VIP coupling (see Fig. 1 in [1]) is given in the algebraic equations 3 - 9. See [1] for the values of the constants used in this model.

$$\rho_i(t) = a\Omega \frac{M_{P,i}(t)}{M_{P,i}(t) + b\Omega} \quad (3)$$

VIP produced by cell

$$\gamma_i(t) = \frac{1}{N} \sum_{j=1}^N \rho_j(t) \quad (4)$$

$\gamma_i$  is the VIP observed by cell  $i$  due to cell  $j$  and  $\alpha_{ij}$  is the reciprocal of the distance between cells  $i$  and  $j$ .

$$\beta = \frac{\gamma}{K_D\Omega + \gamma} \quad (5)$$

receptor density

$$k\Omega C a_{Cytosol}^{2+} = \nu_0\Omega + \nu_1\Omega\beta \quad (6)$$

cytosolic calcium balance

$$\nu_K = V_{MK}\Omega \frac{C a_{Cytosol}^{2+}}{K_a + C a_{Cytosol}^{2+}} \quad (7)$$

maximum kinase rate

$$\lambda = \frac{CB_T\Omega CB^*}{K_C\Omega + CB^*} \quad (8)$$

extent of CREB activation

$$\nu_{sP} = \nu_{sP0}\Omega + \lambda \quad (9)$$

maximum per transcription rate

Table 1: Reactions 1 – 27 in 17 state model based on 16 state Leloup & Goldbeter model with added CREB equation

|    | Reaction                     | Probability of reaction                                                    | Transitions                                                                       |
|----|------------------------------|----------------------------------------------------------------------------|-----------------------------------------------------------------------------------|
| 0  | $G \rightarrow G + M_P$      | $w_0 = (\nu_{sP}\Omega) \frac{B_N^n}{(K_{AP}\Omega)^n + B_N^n}$            | $M_P \rightarrow M_P + 1$                                                         |
| 1  | $M_P \rightarrow$            | $w_1 = (\nu_{mP}\Omega) \frac{M_P}{(K_{mP}\Omega) + M_P}$                  | $M_P \rightarrow M_P - 1$                                                         |
| 2  | $M_P \rightarrow$            | $w_2 = k_{dmp}M_P$                                                         | $M_P \rightarrow M_P - 1$                                                         |
| 3  | $G \rightarrow G + M_C$      | $w_3 = (\nu_{sC}\Omega) \frac{B_N^n}{(K_{AC}\Omega)^n + B_N^n}$            | $M_C \rightarrow M_C + 1$                                                         |
| 4  | $M_C \rightarrow$            | $w_4 = (\nu_{mC}\Omega) \frac{M_C}{(K_{mC}\Omega) + M_C}$                  | $M_C \rightarrow M_C - 1$                                                         |
| 5  | $M_C \rightarrow$            | $w_5 = k_{dmc}M_C$                                                         | $M_C \rightarrow M_C - 1$                                                         |
| 6  | $G \rightarrow G + M_B$      | $w_6 = (\nu_{sB}\Omega) \frac{(K_{IB}\Omega)^m}{(K_{IB}\Omega)^m + B_N^m}$ | $M_B \rightarrow M_B + 1$                                                         |
| 7  | $M_B \rightarrow$            | $w_7 = (\nu_{mB}\Omega) \frac{M_B}{(K_{mB}\Omega) + M_B}$                  | $M_B \rightarrow M_B - 1$                                                         |
| 8  | $M_B \rightarrow$            | $w_8 = k_{dmb}M_B$                                                         | $M_B \rightarrow M_B - 1$                                                         |
| 9  | $M_P \rightarrow P_C$        | $w_9 = k_{sp}M_P$                                                          | $P_C \rightarrow P_C + 1$                                                         |
| 10 | $P_C \rightarrow P_{CP}$     | $w_{10} = (V_{1P}\Omega) \frac{P_C}{(K_p\Omega) + P_C}$                    | $P_C \rightarrow P_C - 1, P_{CP} \rightarrow P_{CP} + 1$                          |
| 11 | $P_{CP} \rightarrow P_C$     | $w_{11} = (V_{2P}\Omega) \frac{P_{CP}}{(K_{dp}\Omega) + P_{CP}}$           | $P_C \rightarrow P_C + 1, P_{CP} \rightarrow P_{CP} - 1$                          |
| 12 | $PC_C \rightarrow P_C + C_C$ | $w_{12} = k_4PC_C$                                                         | $P_C \rightarrow P_C + 1, C_C \rightarrow C_C + 1$<br>$PC_C \rightarrow PC_C - 1$ |
| 13 | $P_C + C_C \rightarrow PC_C$ | $w_{13} = (\frac{k_3}{\Omega})P_C C_C$                                     | $P_C \rightarrow P_C - 1, C_C \rightarrow C_C - 1$<br>$PC_C \rightarrow PC_C + 1$ |
| 14 | $P_C \rightarrow$            | $w_{14} = k_{dn}P_C$                                                       | $P_C \rightarrow P_C - 1$                                                         |
| 15 | $M_C \rightarrow C_C$        | $w_{15} = k_{sC}M_C$                                                       | $C_C \rightarrow C_C + 1$                                                         |
| 16 | $C_C \rightarrow C_{CP}$     | $w_{16} = (V_{1C}\Omega) \frac{C_C}{(K_p\Omega) + C_C}$                    | $C_C \rightarrow C_C - 1, C_{CP} \rightarrow C_{CP} + 1$                          |
| 17 | $C_{CP} \rightarrow C_C$     | $w_{17} = (V_{2C}\Omega) \frac{C_{CP}}{(K_{dp}\Omega) + C_{CP}}$           | $C_C \rightarrow C_C + 1, C_{CP} \rightarrow C_{CP} - 1$                          |
| 18 | $C_C \rightarrow$            | $w_{18} = k_{dnc}C_C$                                                      | $C_C \rightarrow C_C - 1$                                                         |
| 19 | $P_{CP} \rightarrow$         | $w_{19} = (\nu_{dPC}\Omega) \frac{P_{CP}}{(K_d\Omega) + P_{CP}}$           | $P_{CP} \rightarrow P_{CP} - 1$                                                   |
| 20 | $P_{CP} \rightarrow$         | $w_{20} = k_{dn}P_{CP}$                                                    | $P_{CP} \rightarrow P_{CP} - 1$                                                   |
| 21 | $C_{CP} \rightarrow$         | $w_{21} = (\nu_{dCC}\Omega) \frac{C_{CP}}{(K_d\Omega) + C_{CP}}$           | $C_{CP} \rightarrow C_{CP} - 1$                                                   |
| 22 | $C_{CP} \rightarrow$         | $w_{22} = k_{dn}C_{CP}$                                                    | $C_{CP} \rightarrow C_{CP} - 1$                                                   |
| 23 | $PC_C \rightarrow PC_{CP}$   | $w_{23} = (V_{1PC}\Omega) \frac{PC_C}{(K_p\Omega) + PC_C}$                 | $PC_C \rightarrow PC_C - 1, PC_{CP} \rightarrow PC_{CP} + 1$                      |
| 24 | $PC_{CP} \rightarrow PC_C$   | $w_{24} = (V_{2PC}\Omega) \frac{PC_{CP}}{(K_{dp}\Omega) + PC_{CP}}$        | $PC_C \rightarrow PC_C + 1, PC_{CP} \rightarrow PC_{CP} - 1$                      |
| 25 | $PC_N \rightarrow PC_C$      | $w_{25} = k_2PC_N$                                                         | $PC_C \rightarrow PC_C + 1, PC_N \rightarrow PC_N - 1$                            |
| 26 | $PC_C \rightarrow PC_N$      | $w_{26} = k_1PC_C$                                                         | $PC_C \rightarrow PC_C - 1, PC_N \rightarrow PC_N + 1$                            |
| 27 | $PC_C \rightarrow$           | $w_{27} = k_{dn}PC_C$                                                      | $PC_C \rightarrow PC_C - 1$                                                       |

Table 2: Reactions 28 – 53 in 17 state model based on 16 state Leloup & Goldbeter model with added CREB equation

|                        | Reaction                     | Probability of reaction                                                                                                                           | Transition                                                                        |
|------------------------|------------------------------|---------------------------------------------------------------------------------------------------------------------------------------------------|-----------------------------------------------------------------------------------|
| $PCn \frac{dPC_N}{dt}$ |                              |                                                                                                                                                   |                                                                                   |
| 28                     | $PC_N \rightarrow PC_{NP}$   | $w_{28} = (V_{3PC}\Omega) \frac{PC_N}{(K_p\Omega) + PC_N}$                                                                                        | $PC_N \rightarrow PC_N - 1, PC_{NP} \rightarrow PC_{NP} + 1$                      |
| 29                     | $PC_{NP} \rightarrow PC_N$   | $w_{29} = (V_{4PC}\Omega) \frac{PC_{NP}}{(K_{dp}\Omega) + PC_{NP}}$                                                                               | $PC_N \rightarrow PC_N + 1, PC_{NP} \rightarrow PC_{NP} - 1$                      |
| 30                     | $PC_N + B_N \rightarrow I_N$ | $w_{30} = (\frac{k_z}{\Omega}) PC_N B_N$                                                                                                          | $PC_N \rightarrow PC_N - 1, B_N \rightarrow B_N - 1$<br>$I_N \rightarrow I_N + 1$ |
| 31                     | $I_N \rightarrow PC_N + B_N$ | $w_{31} = k_8 I_N$                                                                                                                                | $PC_N \rightarrow PC_N + 1, B_N \rightarrow B_N + 1$<br>$I_N \rightarrow I_N - 1$ |
| 32                     | $PC_N \rightarrow$           | $w_{32} = k_{dn} PC_N$                                                                                                                            | $PC_N \rightarrow PC_N - 1$                                                       |
| 33                     | $PC_{CP} \rightarrow$        | $w_{33} = (V_{dPCC}\Omega) \frac{PC_{CP}}{(K_d\Omega) + PC_{CP}}$                                                                                 | $PC_{CP} \rightarrow PC_{CP} - 1$                                                 |
| 34                     | $PC_{CP} \rightarrow$        | $w_{34} = k_{dn} PC_{CP}$                                                                                                                         | $PC_{CP} \rightarrow PC_{CP} - 1$                                                 |
| 35                     | $PC_{NP} \rightarrow$        | $w_{35} = (V_{dPCN}\Omega) \frac{PC_{NP}}{(K_d\Omega) + PC_{NP}}$                                                                                 | $PC_{NP} \rightarrow PC_{NP} - 1$                                                 |
| 36                     | $PC_{NP} \rightarrow$        | $w_{36} = k_{dn} PC_{NP}$                                                                                                                         | $PC_{NP} \rightarrow PC_{NP} - 1$                                                 |
| 37                     | $M_B \rightarrow B_C$        | $w_{37} = k_{sB} M_B$                                                                                                                             | $B_C \rightarrow B_C + 1$                                                         |
| 38                     | $B_C \rightarrow B_{CP}$     | $w_{38} = (V_{1B}\Omega) \frac{B_C}{(K_p\Omega) + B_C}$                                                                                           | $B_C \rightarrow B_C - 1, B_{CP} \rightarrow B_{CP} + 1$                          |
| 39                     | $B_{CP} \rightarrow B_C$     | $w_{39} = (V_{2B}\Omega) \frac{B_{CP}}{(K_{dp}\Omega) + B_{CP}}$                                                                                  | $B_C \rightarrow B_C + 1, B_{CP} \rightarrow B_{CP} - 1$                          |
| 40                     | $B_C \rightarrow B_N$        | $w_{40} = k_5 B_C$                                                                                                                                | $B_C \rightarrow B_C - 1, B_N \rightarrow B_N + 1$                                |
| 41                     | $B_N \rightarrow B_C$        | $w_{41} = k_6 B_N$                                                                                                                                | $B_C \rightarrow B_C + 1, B_N \rightarrow B_N - 1$                                |
| 42                     | $B_C \rightarrow$            | $w_{42} = k_{dn} B_C$                                                                                                                             | $B_C \rightarrow B_C - 1$                                                         |
| 43                     | $B_{CP} \rightarrow$         | $w_{43} = (V_{dBC}\Omega) \frac{B_{CP}}{(K_d\Omega) + B_{CP}}$                                                                                    | $B_{CP} \rightarrow B_{CP} - 1$                                                   |
| 44                     | $B_{CP} \rightarrow$         | $w_{44} = k_{dn} B_{CP}$                                                                                                                          | $B_{CP} \rightarrow B_{CP} - 1$                                                   |
| 45                     | $B_N \rightarrow B_{NP}$     | $w_{45} = (V_{3B}\Omega) \frac{B_N}{(K_p\Omega) + B_N}$                                                                                           | $B_N \rightarrow B_N - 1, B_{NP} \rightarrow B_{NP} + 1$                          |
| 46                     | $B_{NP} \rightarrow B_N$     | $w_{46} = (V_{4B}\Omega) \frac{B_{NP}}{(K_{dp}\Omega) + B_{NP}}$                                                                                  | $B_N \rightarrow B_N + 1, B_{NP} \rightarrow B_{NP} - 1$                          |
| 47                     | $B_N \rightarrow$            | $w_{47} = k_{dn} B_N$                                                                                                                             | $B_N \rightarrow B_N - 1$                                                         |
| 48                     | $B_{NP} \rightarrow$         | $w_{48} = (V_{dBN}\Omega) \frac{B_{NP}}{(K_d\Omega) + B_{NP}}$                                                                                    | $B_{NP} \rightarrow B_{NP} - 1$                                                   |
| 49                     | $B_{NP} \rightarrow$         | $w_{49} = k_{dn} B_{NP}$                                                                                                                          | $B_{NP} \rightarrow B_{NP} - 1$                                                   |
| 50                     | $I_N \rightarrow$            | $w_{50} = (V_{dIN}\Omega) \frac{I_N}{(K_d\Omega) + I_N}$                                                                                          | $I_N \rightarrow I_N - 1$                                                         |
| 51                     | $I_N \rightarrow$            | $w_{51} = k_{dn} I_N$                                                                                                                             | $I_N \rightarrow I_N - 1$                                                         |
| 52                     | $CB^* \rightarrow$           | $w_{52} = \Omega \left( \frac{\nu_P}{CB_T} \right) \left[ \left( \frac{\nu_K}{\nu_P} \right) \frac{\Omega - CB^*}{K_1 + (\Omega - CB^*)} \right]$ | $CB^* \rightarrow CB^* + 1$                                                       |
| 53                     | $CB^* \rightarrow$           | $w_{53} = \Omega \left( \frac{\nu_P}{CB_T} \right) \frac{CB^*}{K_2 + CB^*}$                                                                       | $CB^* \rightarrow CB^* - 1$                                                       |

## Additional Drosophila Model Coupling Mechanisms

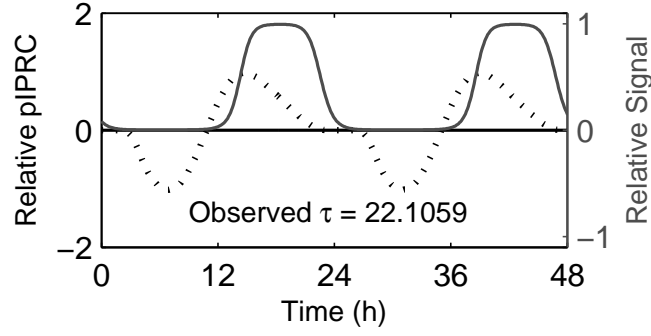

(a) Coupling Mechanism: *tim* mRNA

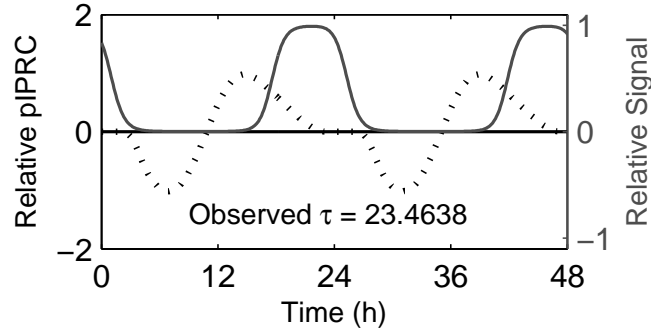

(b) Coupling Mechanism: Cytoplasmic PER:TIM

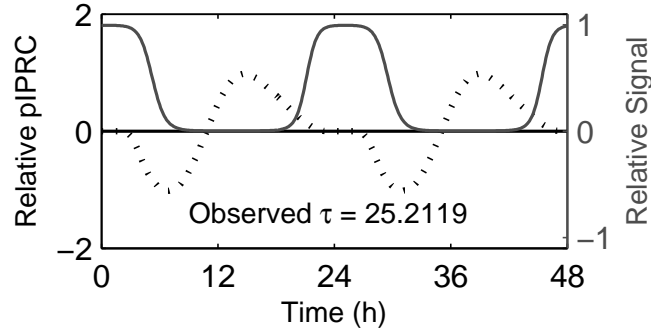

(c) Coupling Mechanism: Nuclear PER:TIM

Figure 1: The pIPRC (black dotted line) and signal trace (gray solid line) for coupling mechanisms which up-regulate *tim* mRNA degradation. The synchronizing factor is up-regulated by (a) *tim* mRNA, (b) cytoplasmic PER:TIM, and (c) nuclear PER:TIM. All curves are relative to the nominal maximal rate of *tim* mRNA degradation.

## References

- [1] T.-L. To, M. Henson, E. Herzog, and F. Doyle III, “A molecular model for intercellular synchronization in the mammalian circadian clock,” *Biophys. J.*, vol. 92, pp. 3792–3803, Mar 2007.
- [2] J.-C. Leloup and A. Goldbeter, “Toward a detailed computational model for the mammalian circadian clock,” *Proc. Natl. Acad. Sci. USA*, vol. 100, no. 12, pp. 7051–7056, Jun 2003.

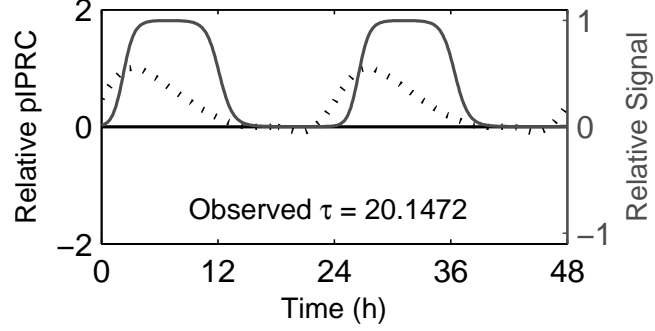

(a) Coupling Mechanism: Cytoplasmic PER

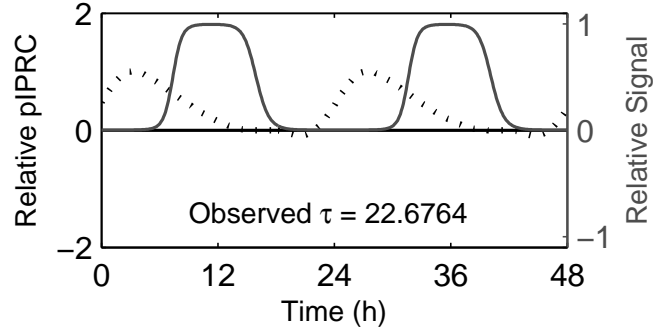

(b) Coupling Mechanism: Cytoplasmic dCLK

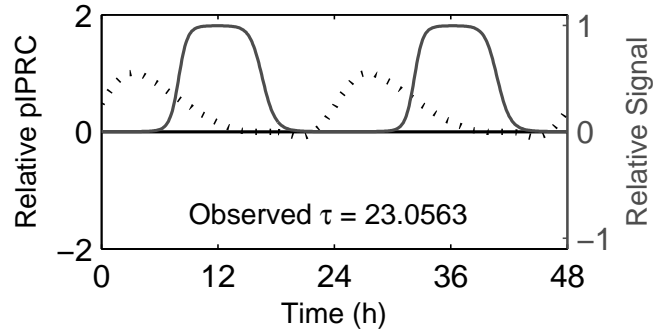

(c) Coupling Mechanism: Cytoplasmic dCLK-CYC

Figure 2: The pIPRC (black dotted line) and signal trace (gray solid line) for coupling mechanisms that up-regulate *dClk* mRNA degradation. The synchronizing factor is up-regulated by cytoplasmic (a) PER, (b) dCLK, and (c) dCLK:CYC. All curves are relative to the nominal maximal rate of *dClk* mRNA degradation.
